# Supplementary material
Source: publisher site journal article supplement (https://www.spandidos-publications.com/4628/downloadSupplementary)

Figure S1. Hematoxylin staining analysis for the 17.5 dpc ovaries that were *in vitro* cultured with different doses KN93 (0, 5, 10 and 15  $\mu$ M) for 4 days. The results demonstrated that the dose of 10  $\mu$ M KN93 was relatively moderate, which not only had a marked inhibition on the development of ovarian follicles, but also caused relatively little damage to the ovarian tissue structure. The yellow arrows indicate primordial follicles, and the red arrows indicate primary follicles. Scale bar, 20  $\mu$ m (the first four columns) and 40  $\mu$ m (the last column). dpc, days post-coitus.

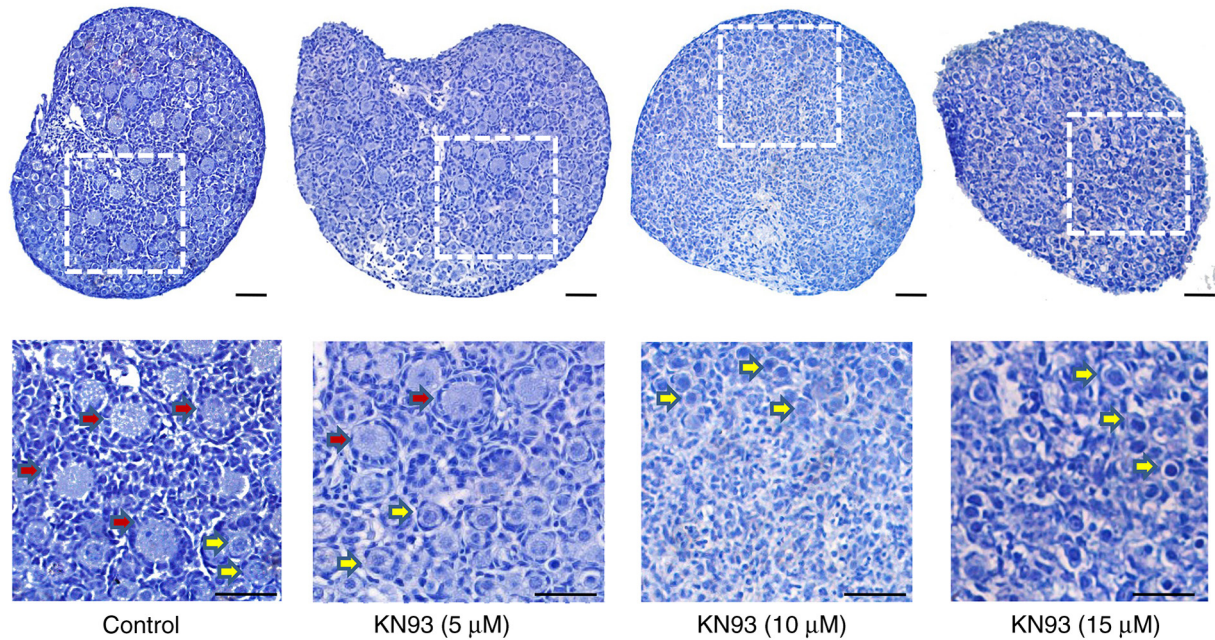

Supplement: Supplementary file 1 [file downloadSupplementary]
